# Supplementary figures and images for: Comprehensive Evaluation of the Biological Properties of Surface-Modified Titanium Alloy Implants
Source: MDPI journal article supplement (doi:10.3390/jcm9020342), 2020-01-25

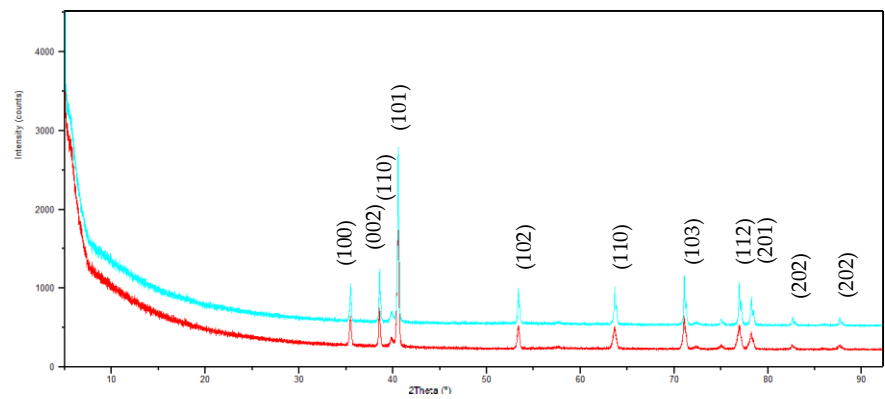

Supplement: s1 [file s1]

## TNT5

Non- sputter

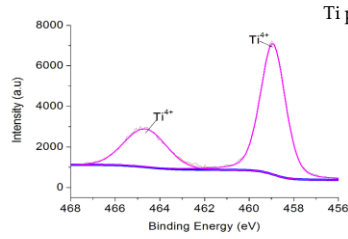

Third-sputter

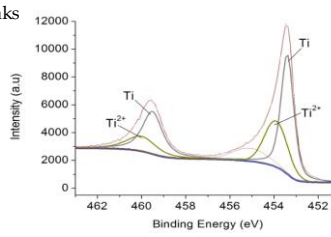

Oxygen peaks

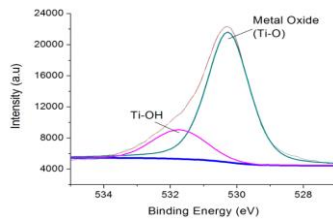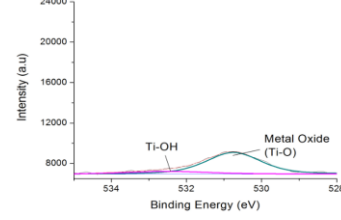

## TNT15

Non- sputter

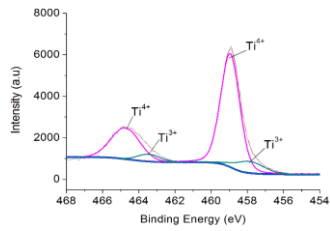

Third-sputter

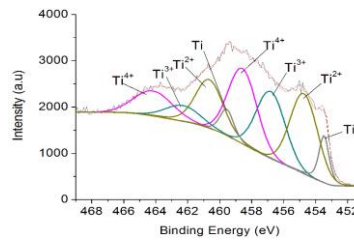

Oxygen peaks

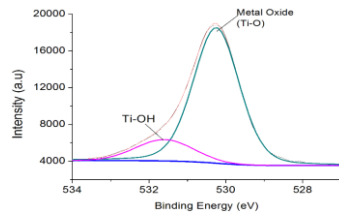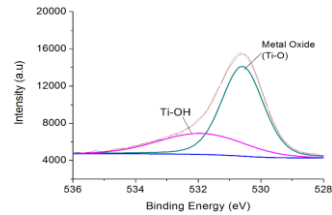

Supplement: s1 [file s1]
